# Supplementary material
Source: Springer Nature journal article supplement (https://www.springermedizin.de/resource/supplementary/12968_2011_2570_MOESM7_ESM.pdf/9582252)

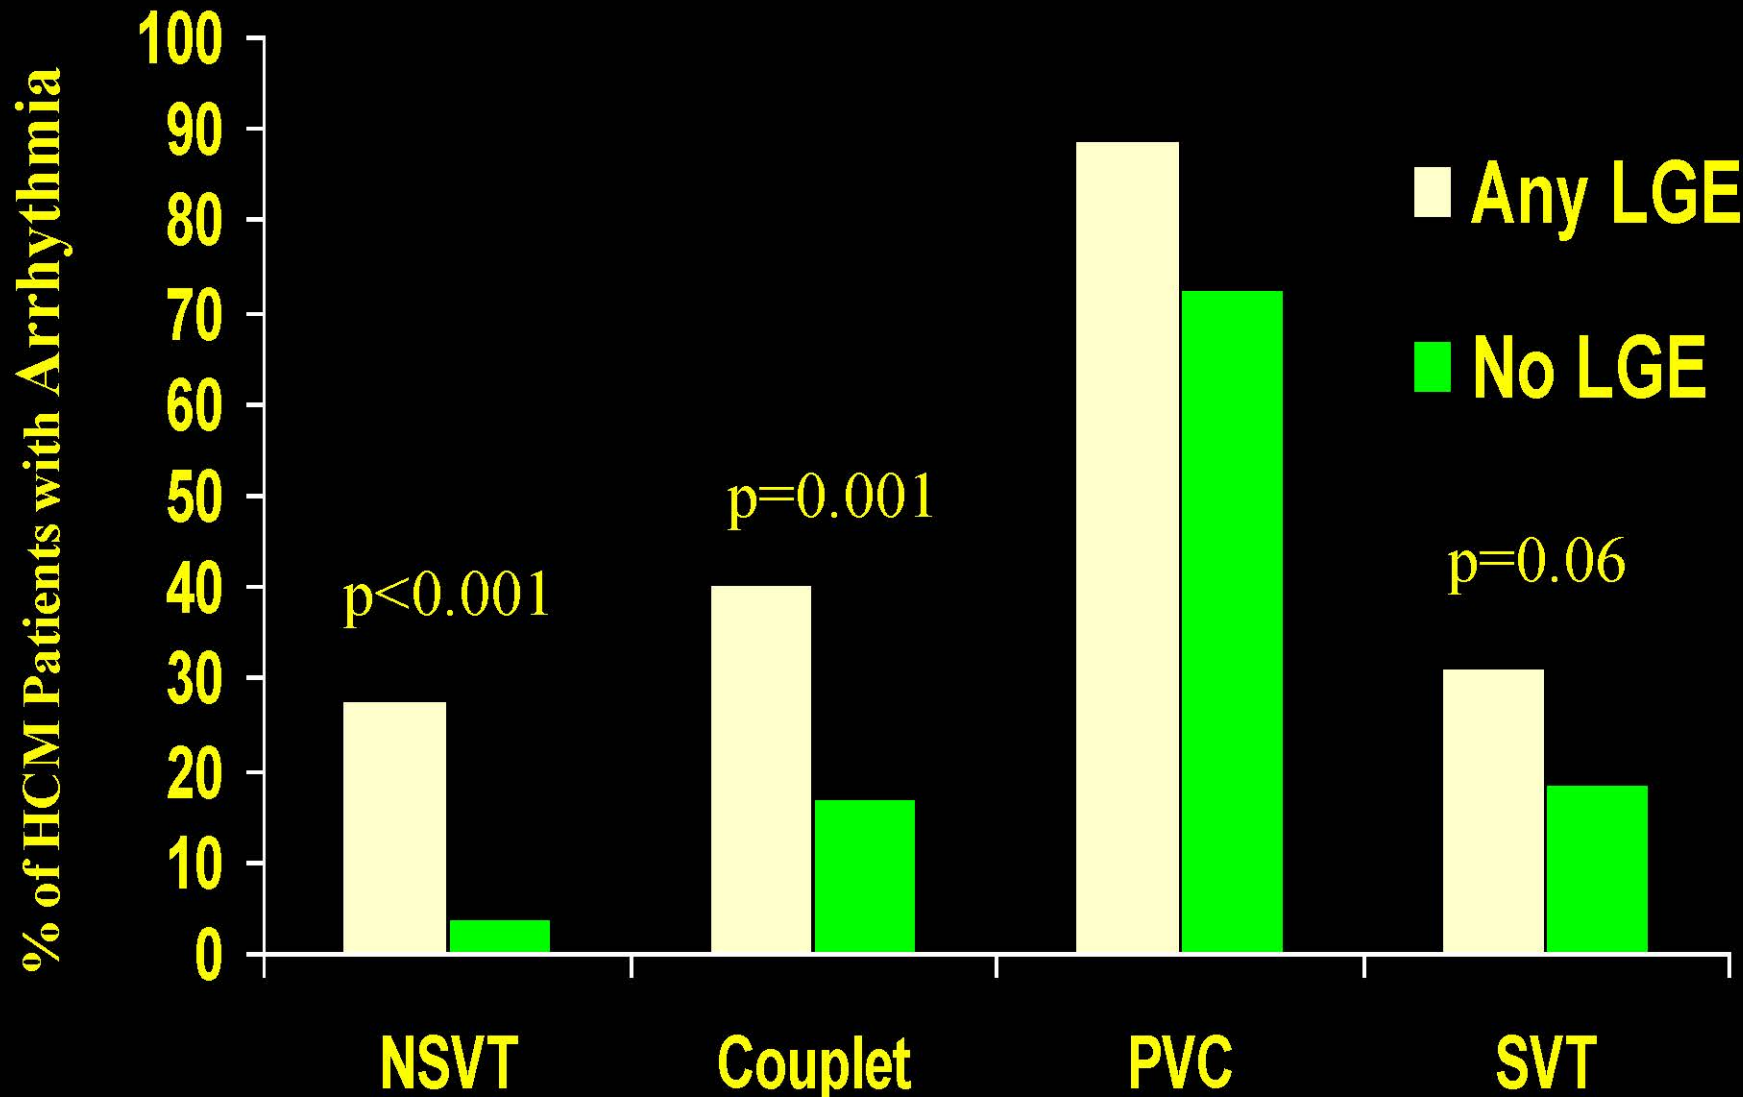

Supplement: MOESM7 [file 9582252]
